# Supplementary material
Source: Springer Nature journal article supplement (https://www.springermedizin.de/resource/supplementary/12916_2013_853_MOESM5_ESM.pdf/9598514)

# RESPONSE

## Fluoxetine versus placebo

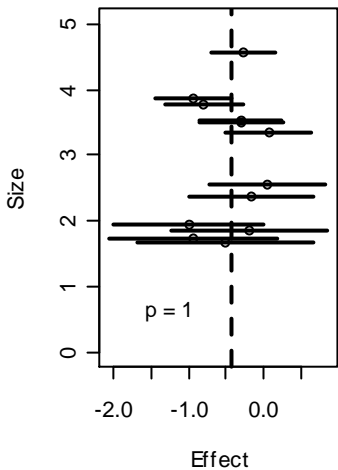

## Venlafaxine versus placebo

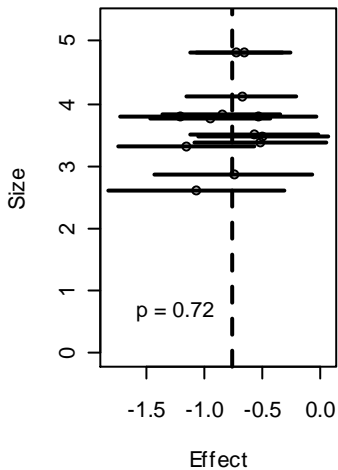

## Venlafaxine versus fluoxetine

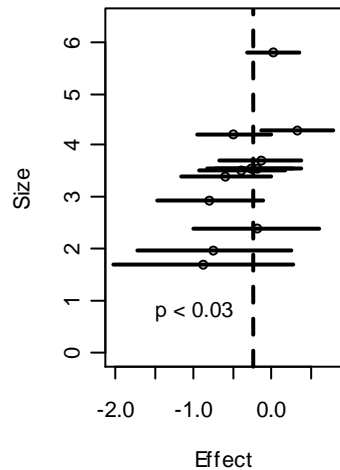

# REMISSION

## Fluoxetine versus placebo

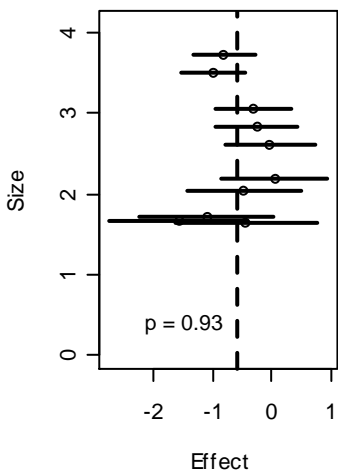

## Venlafaxine versus placebo

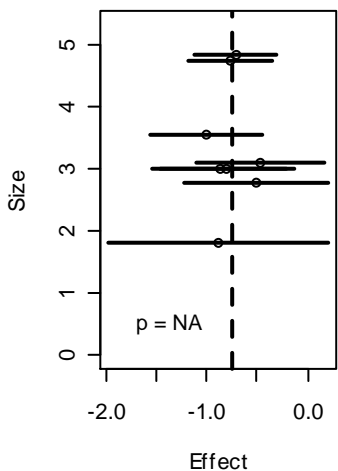

## Venlafaxine versus fluoxetine

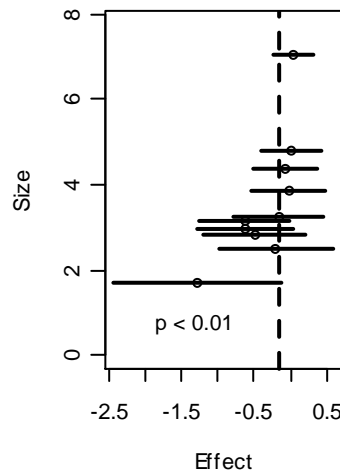

Supplement: MOESM5 [file 9598514]
